# Supplementary material for: Biosynthesis of brain cytoplasmic 200 RNA
Source: PubMed Central journal article supplement (PMC5537265; doi:10.1038/s41598-017-05097-3), 2017-07-31
Supplement: 41598_2017_5097_MOESM1_ESM.pdf [file 41598_2017_5097_MOESM1_ESM.pdf]

# Supplementary Data

## **Biosynthesis of brain cytoplasmic 200 RNA**

Youngmi Kim<sup>1</sup>, Jungmin Lee<sup>1</sup>, Heegwon Shin<sup>1</sup>, Seonghui Jang<sup>1</sup>, Sun Chang Kim<sup>2</sup>, and Younghoon Lee<sup>1\*</sup>

<sup>1</sup>*Department of Chemistry and* <sup>2</sup>*Department of Biological Sciences, KAIST, Daejeon, Korea*

\*Correspondence and requests for materials should be addressed to Y.L.  
(email: [Younghoon.Lee@kaist.ac.kr](mailto:Younghoon.Lee@kaist.ac.kr))

**Table S1. Half-lives of ectopically expressed M1 RNA calculated from Fig. S2.**

| Cell line  | Half-life (h)   |
|------------|-----------------|
| SK-BR-3    | ND <sup>a</sup> |
| MCF10A     | 3.7             |
| MDA-MB-231 | 10              |
| HaCaT      | 7.3             |
| T47D       | 5.8             |
| HeLa       | 9.7             |
| Hs578T     | 5.6             |
| MDA-MB-435 | 8.8             |
| MCF7       | 5.5             |

<sup>a</sup>Not determined

## Supplementary figure legends

**Figure S1. Effects of TBP on BC200 RNA transcription.** (A) The effects of TATA-like sequence mutation (u28/23m) and TBP knockdown on BC200 RNA transcription were examined. The -100 nt upstream constructs expressing RNA $\Delta\Delta$  with or without u28/23m were introduced into HeLa cells treated with TBP siRNA (siTBP#1) or a control negative siRNA (siNe). The cells were transfected with 0.75  $\mu\text{g}$  of plasmids expressing BC200 RNA or its derivatives, 0.5  $\mu\text{g}$  of the M1 RNA expressing plasmid, and 45 pmole of siRNA. TBP knockdown was confirmed by semi-quantitative RT-PCR analysis of TBP mRNA using GAPDH mRNA as a control. RNA transcription levels were determined by analyzing total RNA with Northern blotting. The lower figures illustrate the mRNA levels of TBP and GAPDH, which were assessed by semi-quantitative RT-PCR to confirm TBP knockdown. Three independent experiments were carried out. The relative expression levels of endogenous BC200 RNA and exogenous RNA $\Delta\Delta$  were calculated by dividing their Northern blot signals by those of the M1 RNA (expressed from a cotransfected M1 RNA expression plasmid) after both sets of signals were normalized with respect to the 5S RNA signal. The ratio of expression in siTBP-treated cell to that in siNe-treated control cells is presented. Serial dilutions (1/2 and 1/4) of total cellular RNA were used for a semi-standard curve. \*,  $P < 0.001$ ; \*\*,  $P < 0.01$ ; \*\*\*,  $P < 0.05$ . BC200 (Endo), endogenous BC200 RNA. (B) ChIP analysis. Full-size agarose gel images for Fig. 2E are shown. TBP antibody-bound DNA fragments were used as PCR templates for amplifying the sequence between positions -100 and +30. TBP, TBP antibody; Beads, rProtein G-agarose beads alone; Control, rabbit preimmune serum. A positive control ChIP assay was also carried out with the GAPDH promoter. Marker, DNA size marker. Input, a parallel analysis with 0.5% of the sheared formaldehyde-crosslinked-chromatin. The PCR products for the BC200 RNA promoter (*upper*) or the GAPDH promoter (*lower*) were analyzed by agarose gel electrophoresis. The spliced images from the same agarose gel were shown with the insertion of dividing lines between spliced lanes.

**Figure S2. Metabolic stability of ectopically expressed M1 RNA.** M1 RNA levels from northern blot data of Fig. 6B were analyzed. The remaining M1 RNA levels ( $\ln[M1]/[M1]_{t=0}$ ) are plotted versus time in hours.

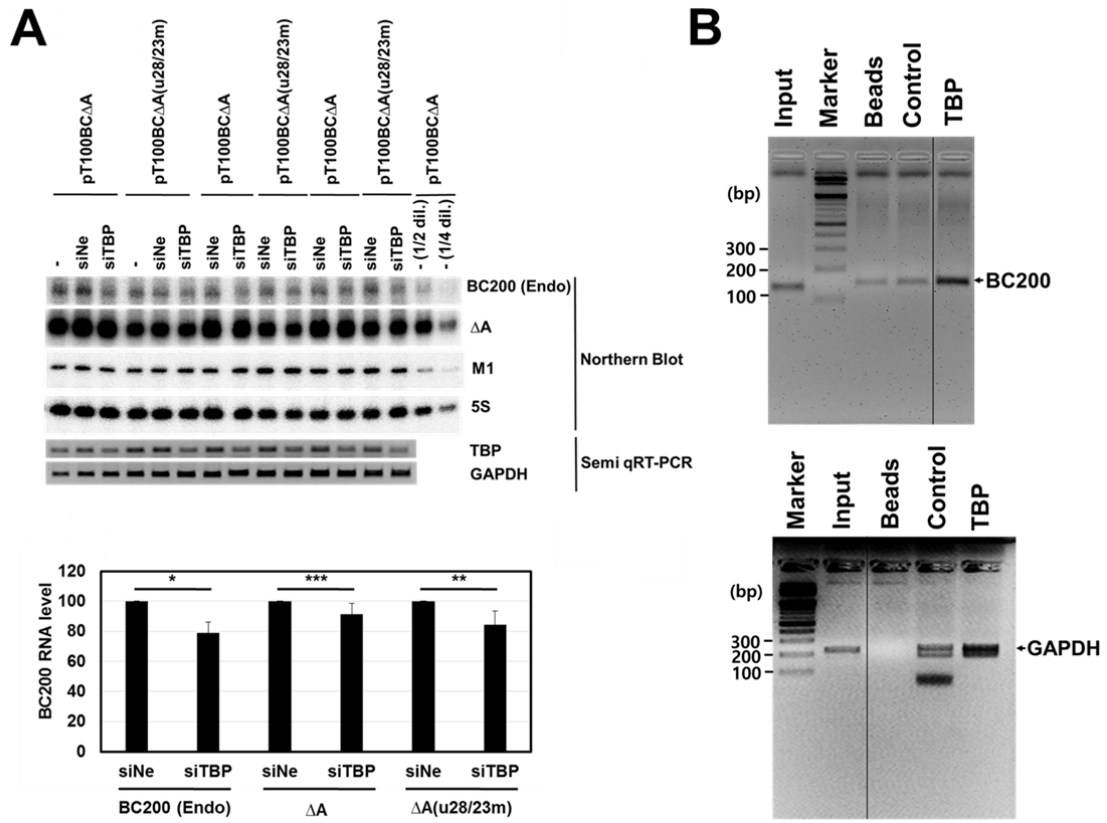

Supplementary Figure 1

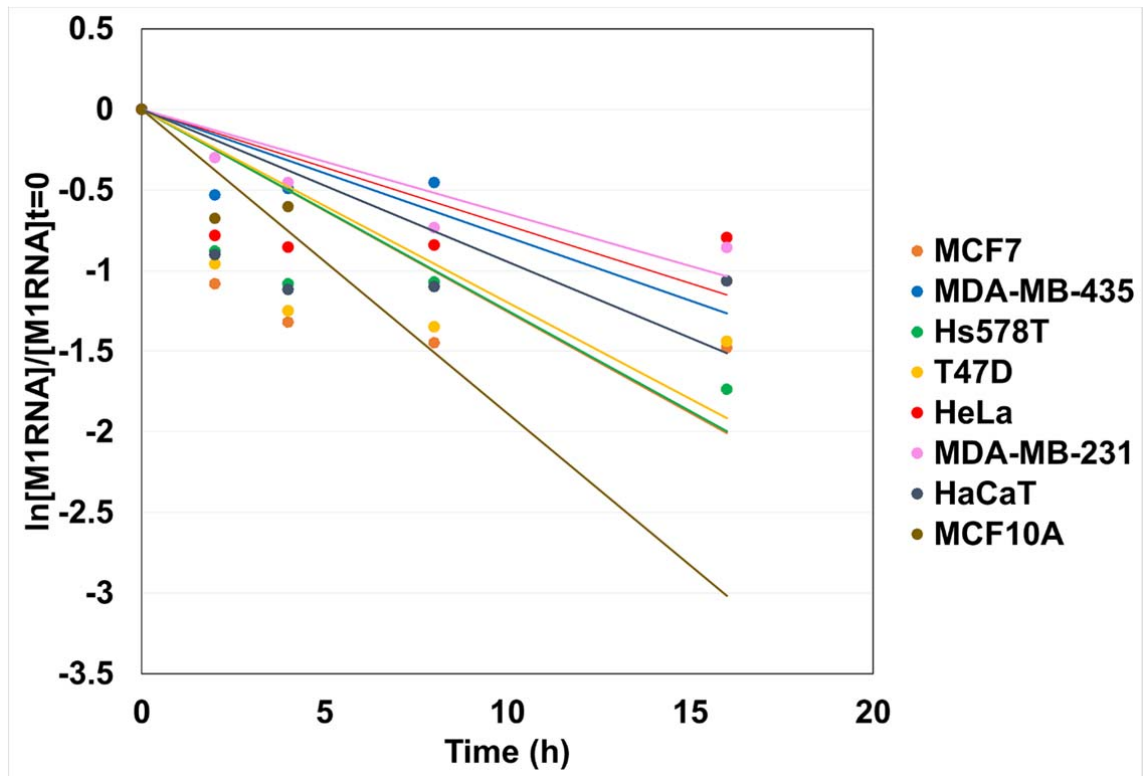

Supplementary Figure 2
